# Supplementary material for: Niemann-Pick C1 Is Essential for Ebolavirus Replication and Pathogenesis In Vivo
Source: PubMed Central journal article supplement — mBio. 2015 May 26;6(3):e00565-15. doi: 10.1128/mBio.00565-15 (PMC4447246; doi:10.1128/mbio.00565-15), 2015-05-26

**A** Percent Weight Loss Following ma-EBOV Challenge

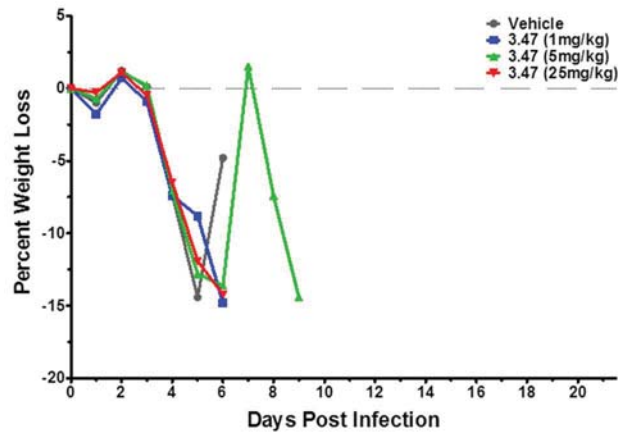

**B** Percent Survival Following ma-EBOV Challenge

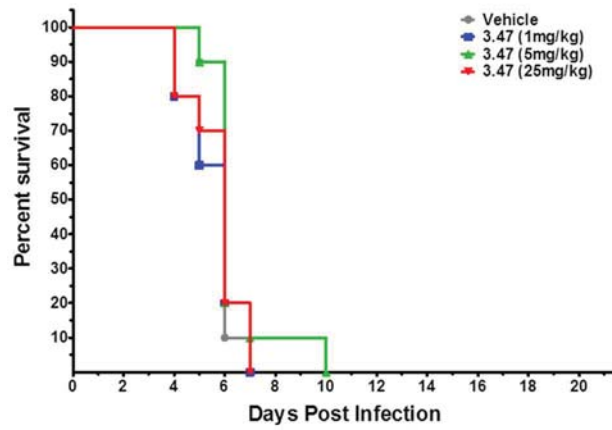

Supplement: mbo003152332sf4.pdf [file mbo003152332sf4.pdf]
