# Supplementary figures and images for: Niemann-Pick C1 Is Essential for Ebolavirus Replication and Pathogenesis In Vivo
Source: PubMed Central journal article supplement — mBio. 2015 May 26;6(3):e00565-15. doi: 10.1128/mBio.00565-15 (PMC4447246; doi:10.1128/mbio.00565-15), 2015-05-26

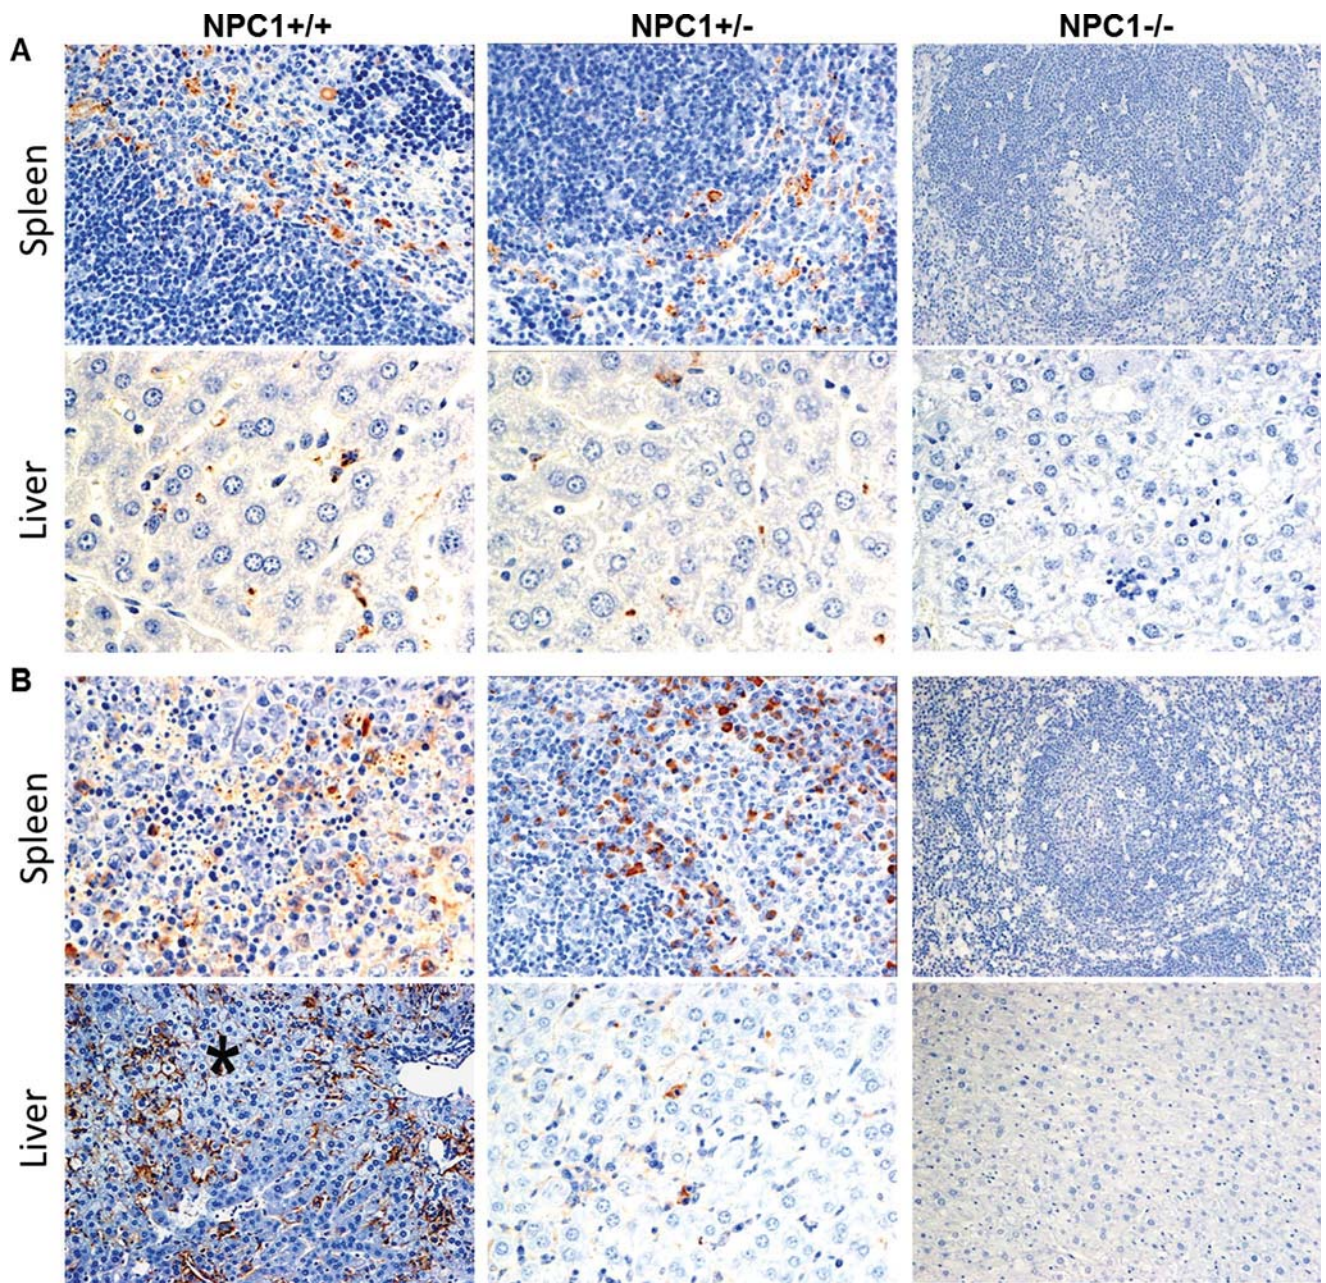

Supplement: mbo003152332sf2.pdf [file mbo003152332sf2.pdf]

Viability of HUVECs Treated with Imipramine

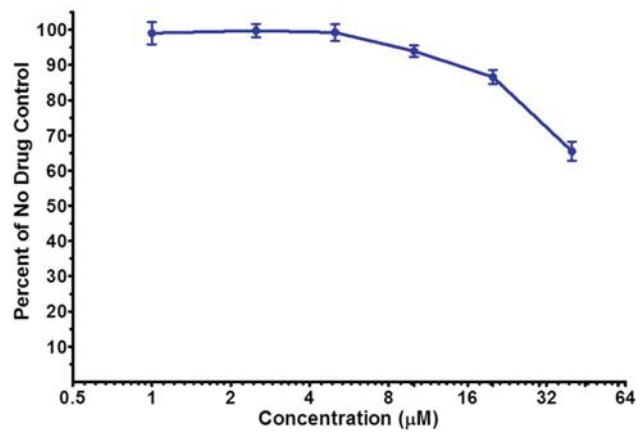

Supplement: mbo003152332sf3.pdf [file mbo003152332sf3.pdf]
